# Supplementary material
Source: ML conference proceedings conference paper supplement (https://proceedings.mlr.press/v84/kim18b.html)
Supplement: Supplementary file 1 [file kim18b-supp.pdf]

---

# Nonparametric Sharpe Ratio Function Estimation in Heteroscedastic Regression Models via Convex Optimization

---

**Seung-Jean Kim**  
Cubist Systematic Strategies

**Johan Lim**  
Seoul National University

**Joong-Ho Won**  
Seoul National University

This document contains supplementary details for the paper “Nonparametric Sharpe Ratio Function Estimation in Heteroscedastic Regression Models via Convex Optimization.” All section, equation, table, and figure numbers in this supplementary document are preceded by the letter S (all section, equation, table, and figure numbers without an S refer to the main paper).

## S1 Additional numerical results for Examples 1 and 2

- Table corresponding to Figure 1: summary statistics for the mean absolute deviation  $\mathcal{E}_{\text{MAD}}$  from the estimation of the Sharpe ratio function  $f(x) = a(X_i + 2 \exp(-16X_i^2))/(0.4 \exp(-2X_i^2) + 0.2)$  in Example 1.

Table S1: mean±std, NA removed.

|       |  | method        |               |               |
|-------|--|---------------|---------------|---------------|
|       |  | proposed      | residual      | difference    |
| $a =$ |  |               |               |               |
| 0.5   |  | 0.3387±0.0339 | 0.4052±0.1449 | 0.7415±0.1057 |
| 1     |  | 0.6714±0.1875 | 0.7579±0.3371 | 1.4457±0.2090 |
| 2     |  | 1.2112±0.3491 | 1.5472±0.6749 | 2.9315±0.3723 |
| 4     |  | 2.3979±0.6788 | 3.3665±2.0591 | 6.5980±1.0484 |

- Table corresponding to Figure 3: summary statistics for the mean absolute deviation  $\mathcal{E}_{\text{MAD}}$  from the estimation of the Sharpe ratio function  $f(x) = \frac{3}{4} \sin(b\pi x)/\sqrt{(x - 1/2)^2 + 1/2}$  in Example 2.

Table S2: mean±std, NA removed.

|       |  | method        |               |               |
|-------|--|---------------|---------------|---------------|
|       |  | proposed      | residual      | difference    |
| $b =$ |  |               |               |               |
| 0     |  | 0.1141±0.0447 | 0.0885±0.0470 | 0.0623±0.0326 |
| 10    |  | 0.2524±0.0426 | 0.6020±0.0604 | 0.6051±0.0532 |
| 20    |  | 0.4556±0.0247 | 0.6272±0.0082 | 0.6248±0.0075 |
| 40    |  | 0.5526±0.0211 | 0.6295±0.0085 | 0.6262±0.0065 |
